# Supplementary material
Source: MDPI journal article supplement (https://www.mdpi.com/2079-9292/10/21/2621)
Supplement: s1 [file s1]

Archive with 2 entries (2 files):
- Supplementary File S1.pdf
- Supplementary File S2.pdf
